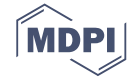

Article

# Principled decision-making workflow with hierarchical Bayesian models of high throughput dose-response measurements

Eric J. Ma <sup>1</sup>  and Arkadij Kummer <sup>2</sup> 

<sup>1</sup> ericmajinglong@gmail.com

<sup>2</sup> ETH Zurich, arkadij.kummer@gmail.com

\* Correspondence should be sent to Eric J. Ma

Version May 2, 2021 submitted to Entropy

**Abstract:** We present a case study applying hierarchical Bayesian estimation on high throughput protein melting point data measured across the tree of life. We show that the model is able to impute reasonable melting temperatures even in the face of unreasonably noisy data. Additionally, we demonstrate how to use the variance in melting temperature posterior distribution estimates to enable principled decision-making in common high throughput measurement tasks, and contrast the decision-making workflow against simple maximum-likelihood curve fitting. We conclude with a discussion of the relative merits of each workflow.

**Keywords:** hierarchical modelling; Bayesian statistics; probabilistic programming; high throughput measurements

## 1. Introduction

High throughput measurements are a staple of biological measurements. A wealth of literature exists for the statistical analysis of high throughput measurement data [1–3]. However, to the best of our knowledge, the application of hierarchical Bayesian models in high throughput assay measurements is not widespread, with only a countably small number of papers leveraging hierarchical Bayesian methods [4,5]. Yet, the advantages of hierarchical models for estimation are well-known. For example, in [6], baseball players' performance estimates are regularized away from extreme values. Players with fewer replicate observations of their fielding statistics had estimates shrunk closer to the population mean, though as more replicate measurements are obtained, the regularization effect diminishes. This property of hierarchical models may be desirable in a high throughput measurement setting, providing a guardrail against being fooled by apparently desirable extreme measurements generated at random, or worse, through systematic error. Because hierarchical Bayesian estimation models require explicit, hand-crafted distributional assumptions, they also help us avoid canned statistical tests where our data might not necessarily fit the test's assumptions (e.g., the t-test) [7]. We thus see a gap in the application of hierarchical Bayesian estimation in high throughput biological assay measurement.

Recently, a global protein 'meltome' was published, in which 41,730 proteins from across 16 species of life had their protein melting points measured in a high throughput fashion, spanning 1,114,710 data points that were released publicly [8]. Protein melting occurs when a protein unfolds under thermal stress; a protein's melting point is thus of interest to biological research. In ecological studies, protein melting points can reveal their host organisms' properties (such as its probable characteristic temperature range). For biomedical applications, having a high melting temperature (i.e., high stability) while maintaining activity is a desirable protein therapeutics property, this property relates to a protein's stability, which can be crucial for preserving a protein therapeutic until it is used.

33 The characteristics of this data are such that they mimic very closely the kind of measurement  
34 data generated in biological screening experiments used for drug hunting and protein engineering.  
35 Firstly, it is of the dose-response curve form; the melting temperature, being the mid-point of the curve,  
36 is analogous to the IC50 concentration values generated in chemical and enzyme screens. Secondly, it  
37 is measured in a high throughput fashion, with extremely high numbers of samples measured, and  
38 with every sample (here, a protein from an organism) being treated equally in bulk. Importantly, they  
39 only have a single replicate measurement on which inferences, and hence decisions, are to be made.  
40 This means that measurements are effectively *sparse* with respect to a sample; even though there may  
41 be anywhere from 6-10 measurements of a sample, these are not biological replicate measurements of  
42 the same sample. This mirrors very closely what we observe in high throughput screen measurements  
43 in drug discovery and high throughput protein engineering, where most samples are measured once,  
44 and prioritization decisions have to be made on the basis of these measurements. As such, we reasoned  
45 that we could use this public data to illustrate how hierarchical Bayesian models can be used to guide  
46 decision-making under uncertainty in a high throughput measurement setting. Where appropriate,  
47 we will contrast the Bayesian workflow against the traditionally used "separate curve fitting" with  
48 maximum likelihood estimation.<sup>1</sup>

### 49 1.1. Base Model Definition

50 The model provided in [8] for the melting temperature of a protein, as done by their measurement  
51 technique, is given by

$$f(L, a, b, T) = \frac{1 - L}{1 + e^{-\left(\frac{a}{T} - b\right)}} + L$$

52 Here,  $L$  is the lower bound of the melting curve, which is treated as a random variable to estimate;  
53  $\frac{a}{b}$  is the characteristic melting point of a protein, and  $T$  is the temperature at which a measurement is  
54 taken.

55 The modifications we made to the model to enable hierarchical modelling are detailed in the  
56 Materials and Methods section.

### 57 1.2. Data characteristics and summary statistics

58 The data that was provided by the authors are 1.1 million rows of measurements, which contain:

- 59 1. The species and extraction method that a protein was isolated from.
- 60 2. The protein ID (a unique identifier encompassing its gene name)
- 61 3. The gene from which the protein is expressed
- 62 4. The temperature at which an observation was taken
- 63 5. The fold change of detected stable protein at that temperature, relative to the level at the lowest  
64 measured temperature.

65 Of the 41,730 proteins that were measured, 11,142 of them had no melting point assigned. This is  
66 a direct result of the curve fitting protocol used in the original analysis [8], which included criteria for  
67 data quality checks.

---

<sup>1</sup> As we are focusing on the application of hierarchical Bayesian methods to high throughput measurements, we will only be discussing the relevant protein biochemistry in light detail. Any biological assumptions and conclusions we draw are held lightly; specific improvements to the model are discussed only in brief.

## 68 2. Validation of model implementation

### 69 2.1. Melting curves

70 To validate whether our model implementation was done correctly or not, we employed a few  
71 diagnostics. Firstly, we rank-ordered proteins by their melting temperatures and spot-checked a subset  
72 of curves. Proteins that had low posterior uncertainty generally had high quality curves, such as the  
73 blue curves in Fig. 1. In this regime, the estimated melting temperatures from separate curve fitting  
74 (dotted lines) generally agreed with the hierarchical Bayesian fits (solid line and shaded area), with  
75 minimal differences in the estimated melting temperature. As the posterior uncertainty increases,  
76 we gradually observe lower quality curves (yellow and red in Fig. 1. In particular, the red curves  
77 come from data that failed quality checks in the original analysis method, and hence did not have an  
78 assigned melting temperature. For the proteins that did have a melting temperature assigned, the  
79 magnitude of the difference between the hierarchical Bayesian estimate and the maximum likelihood  
80 estimate co-varies with the magnitude of the posterior distribution standard deviation, but is generally  
81 centered around zero (Fig. 2).

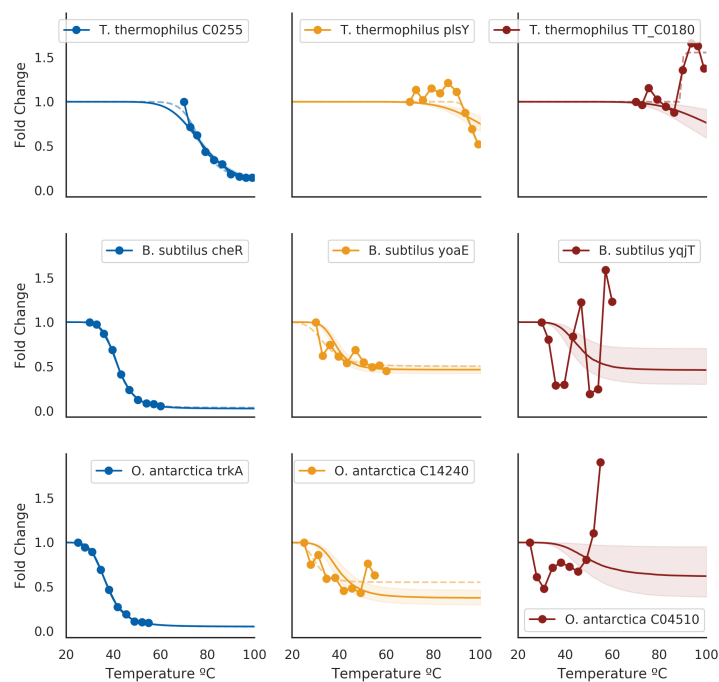

**Figure 1.** Example estimated melting curves against original measurement data for three species (by row). Blue figures are curves from proteins that had the lowest variance in estimated melting temperatures for each species. Yellow figures are curves from proteins for which melting points are not obvious from the data and did not have an assigned melting temperature, but nonetheless could plausibly be assigned one. Red figures are curves from proteins that exhibited highest variance in estimated melting temperature for each species. Dotted lines indicate separate curve fit using SciPy's curve fitting facilities (Materials and Methods); cases where errors were raised in curve fitting are omitted.

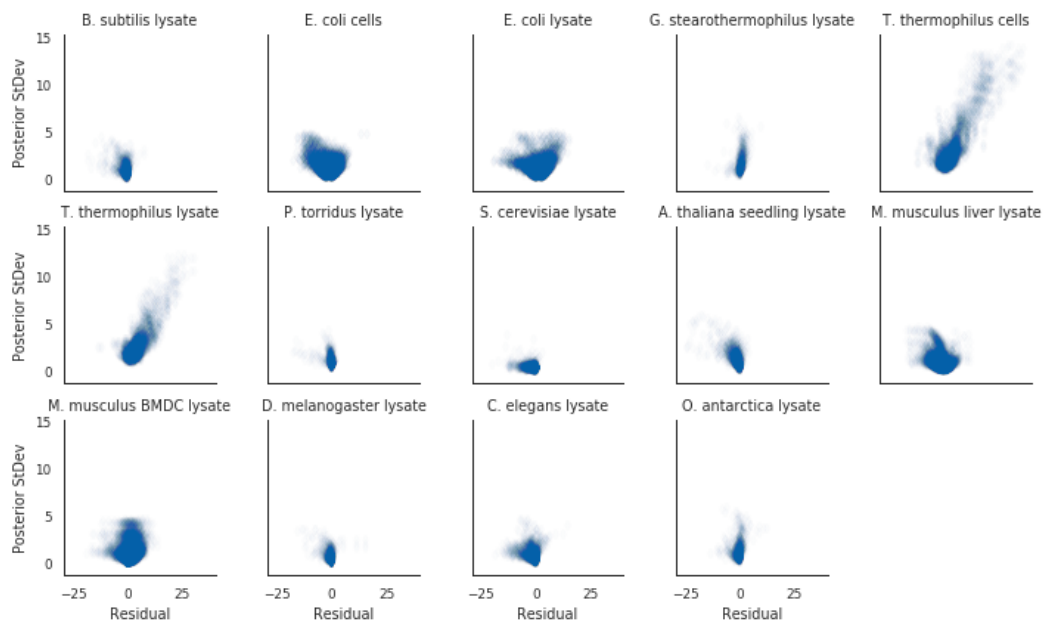

**Figure 2.** Proteins with greater discrepancies between the two methods for their estimated melting points also had greater uncertainties for their Bayesian estimated melting points. Residual is calculated by taking the Bayesian estimated melting point minus the separate curve estimated melting point.

82 *2.2. Posterior variance*

83 In the meltome paper, proteins that had melting curves that failed quality control checks did not  
84 get assigned a melting temperature. In a hierarchical Bayesian setting, we expect that these proteins'  
85 curves should give us high uncertainty in their posterior estimates. Indeed, in our model fits, we  
86 observe this phenomena. Where our model imputed a protein's melting temperature because of bad  
87 curve data (as assessed by the curve quality control checks), the posterior uncertainties for those  
88 melting temperatures were much higher than those without imputation (Fig. 3).

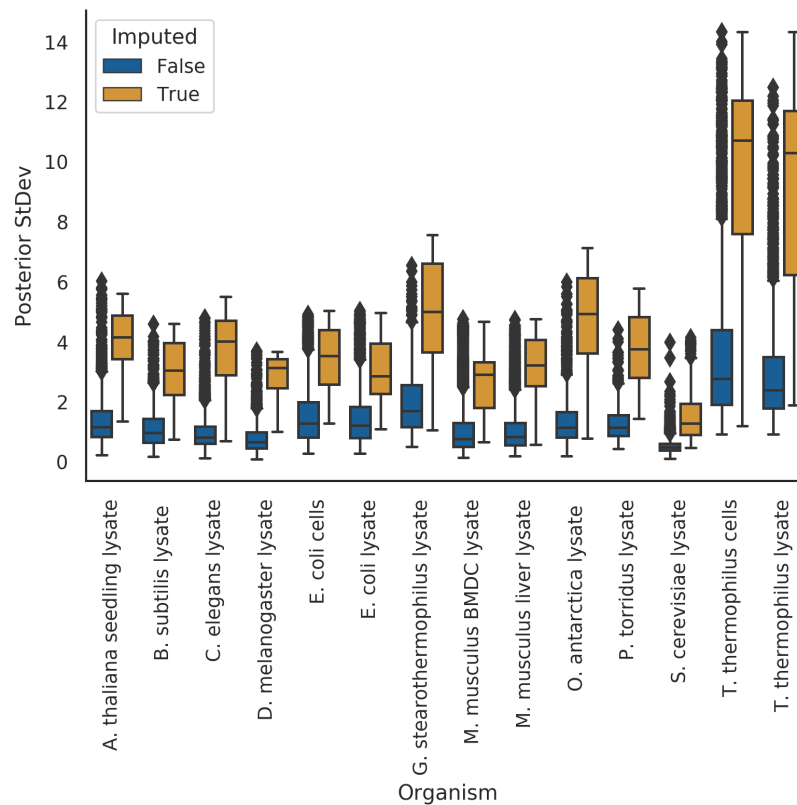

**Figure 3.** Imputed melting temperatures have higher uncertainty than non-imputed melting temperatures.

### 89 3. Principled, Bayesian decision-making in high throughput settings

90 In this section, we discuss what hierarchical Bayesian modeling enables when used in lieu of  
91 separate curve fitting.

92 In a setting where we measure high throughput dose response data, the goal is to find  
93 extreme-valued entities on the desirable side, such as low IC50 molecules for protein binders, or  
94 high stability proteins for stability. Some downstream questions that need to be answered generally  
95 fall into the categories of:

- 96 1. Which samples need *higher quality confirmatory measurements*?
- 97 2. Which samples should we *take forward for further investigation* in other measurement modes?

98 A classic constraint we find ourselves in is that of capacity: it is infeasible to take everything that  
99 is desirable. Additionally, it is desirable for us to have a ranking principle that factors in the confidence  
100 we have in any particular sample measurement. Leveraging the uncertainty in our estimates gives us  
101 a path towards principled decision making.

102 In the next two sections, we outline how to address the decision-making dilemma in a principled  
103 fashion.

#### 104 3.1. Acquiring informative measurements

105 One of our goals might be to acquire re-measurements of samples to improve the quality of our  
106 data set. To do so, we could rank-order samples by their posterior uncertainty in their measurements.  
107 (Fig. 4 (a)) In our example, this would be samples that have the highest posterior variance in  
108 melting temperatures; in classic molecular screening settings, this may be samples with highest  
109 IC50 measurement uncertainties. Doing so would allow us to improve our data set quality in an  
110 iterative fashion, with uncertainty being the guiding principle for re-measurement.

111 3.2. *Confirming optimal measurements*

112 In a vein similar to the acquisition of more informative measurements, we may wish to acquire  
113 confirmatory or secondary measurements on samples that have measurement values greater than  
114 a particular threshold. An example where this shows up is in enzyme engineering. Our primary  
115 assay measurement may be cheap to conduct, but the confirmatory assay may be more expensive. In  
116 addition, we may be doing multi-objective optimization, and the secondary properties that we are  
117 optimizing for may be similarly expensive to measure. Made concrete, enzyme thermal stability is  
118 often a cheap and high-throughput measurement to acquire, while enzyme chiral activity requires  
119 more sophisticated instrumentation and is hence more difficult to conduct. In scenarios like this,  
120 our desired selection of samples are the ones that have the highest probability of being above some  
121 threshold we define *a priori*. (Fig. 4 (b) Here, access to the posterior distribution allows us to calculate  
122 the probability of a sample being greater than a particular value and thus rank-order all samples  
123 according to this principle.

124 3.3. *Prioritizing samples for further modification*

125 One other goal we might have would be to select samples from the pool of measurements as a  
126 baseline for further optimization. This is a classic protein and molecular engineering problem. Given  
127 the uncertainties in our measurements, by what principle could we select samples as our baseline?

128 This problem is similar to the previous section, where the desired outcome is the selection of  
129 the *best* new starting point. The difference lies in that in molecular and protein engineering, we are  
130 effectively optimizing, or searching, for samples that have *extreme* values. Higher activities, greater  
131 binding affinities, or smaller catalysis rates are what we are in search of. Hence, we once again  
132 desire samples that have the highest probability of being better than the rest as our new starting  
133 point. To calculate this, we would simply compare each sample's posterior estimates and calculate  
134 the probability of superiority w.r.t. other samples' estimates (Fig. 4 (c)). By contrast, under a classical  
135 setting, picking the sample with the most desirable point estimate would only give us samples that  
136 have the highest expected value, which does not help us explore extremities as effectively.

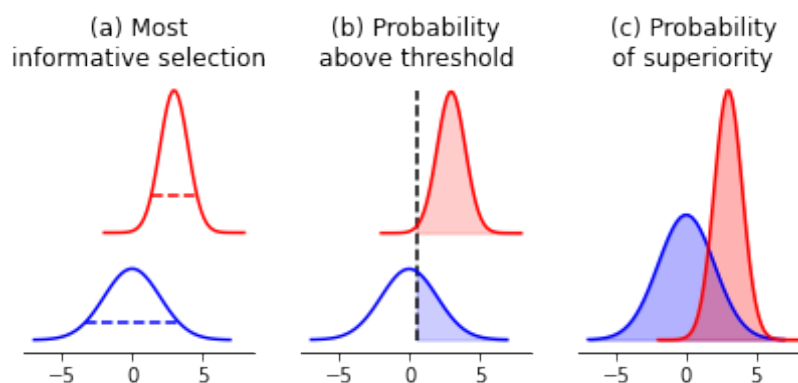

**Figure 4.** Probabilistic decision-making framework leveraging posterior distributions. (a) In choosing the next most informative re-measurement, we would suggest taking the blue sample because it has the highest uncertainty. (b) In choosing samples for confirmatory measurements that are above a threshold value defined *a priori*, we would suggest taking the red sample because it has the highest probability of being greater than a threshold value. (c) To decide which samples to use as a base for further modification towards extreme values, we would calculate the probability of superiority between all pairs of samples and identify the one that has the highest probability.

| Run Name                     | Mean  | StDev | Min  | 25%   | 50%   | 75%   | Max   |
|------------------------------|-------|-------|------|-------|-------|-------|-------|
| A. thaliana seedling lysate  | 43.8  | 1.5   | 34.6 | 43.1  | 43.9  | 44.5  | 49.6  |
| B. subtilis lysate           | 43.7  | 3.0   | 36.8 | 41.9  | 43.8  | 44.8  | 58.4  |
| C. elegans lysate            | 44.0  | 3.5   | 34.2 | 42.2  | 44.5  | 45.4  | 57.6  |
| D. melanogaster lysate       | 43.3  | 2.6   | 39.2 | 41.9  | 42.5  | 43.7  | 54.6  |
| E. coli cells                | 54.1  | 3.5   | 45.4 | 51.8  | 53.8  | 55.7  | 67.1  |
| E. coli lysate               | 55.2  | 4.6   | 45.9 | 51.8  | 54.1  | 57.9  | 67.3  |
| G. stearothermophilus lysate | 81.9  | 5.7   | 59.7 | 77.7  | 81.3  | 85.8  | 97.3  |
| M. musculus BMDC lysate      | 49.4  | 2.0   | 44.0 | 48.2  | 49.4  | 50.7  | 60.0  |
| M. musculus liver lysate     | 51.0  | 2.2   | 44.4 | 49.7  | 51.0  | 51.8  | 64.1  |
| O. antarctica lysate         | 48.8  | 4.5   | 36.5 | 46.0  | 47.5  | 51.3  | 63.7  |
| P. torridus lysate           | 72.9  | 3.6   | 65.2 | 70.5  | 72.2  | 74.5  | 83.6  |
| S. cerevisiae lysate         | 47.1  | 2.3   | 40.9 | 45.7  | 46.8  | 48.4  | 55.4  |
| T. thermophilus cells        | 108.5 | 8.5   | 80.7 | 104.8 | 110.3 | 114.5 | 125.0 |
| T. thermophilus lysate       | 107.3 | 8.4   | 79.2 | 101.8 | 109.0 | 113.4 | 125.0 |

**Table 1.** Summary statistics of the imputed melting temperatures, excluding *D. rerio*.

## 137 4. Discussion

### 138 4.1. Hierarchical Bayesian methods enable reasonable estimates where separate curve-fitting fails to provide one

139 The key analysis "safeguards" that the meltome authors used to call a non-melter, and hence  
140 assign no melting temperature to a protein, was a combination of a threshold value for the lower-bound  
141 and a normalized area under the curve value [8,9]. However, one may ask the question: do we expect  
142 proteins to "not melt" under increasing thermal stress? Using a hierarchical Bayesian model, we  
143 effectively express a prior in the model structure that all proteins do *eventually* "melt" under thermal  
144 stress; proteins with low quality measurements can still be assigned a melting temperature. As shown  
145 by our imputation distributions, the imputed values generally fall within the regime of This stands in  
146 contrast to the original statistical analysis protocol, in which this model-wise structural assumption  
147 cannot be encoded in the model, thus requiring external heuristics as a safeguard for "quality" of data.  
148 As for the question of which assumption is more reasonable, the answer would require debate and  
149 justification.

150 In the meltome atlas authors' statistical methods, data that did not fulfill quality control criteria  
151 were given a null value for their estimated melting temperatures. By contrast, our use of a hierarchical  
152 Bayesian model that baked in biologically-relevant priors enabled us to provide imputed melting  
153 points that fell within the general regime of those that *did* have melting points estimated (Table 1),  
154 Because we have the posterior distributions inferred, further statistical analysis can leverage this  
155 model-based multiple imputation [10]. In doing so, we have managed to preserve hard-won data  
156 points without discarding them, even if their quality were questionable, and we have a framework for  
157 deciding which to re-measure if we so desired.

158 A natural caveat to this imputation method is that the imputed values are only as good as the  
159 model's assumptions. For example, we do not factor in horizontal gene transfer or prior knowledge  
160 of a protein's known function, both of which might affect our estimates of that protein's melting  
161 point. We reiterate, as a reminder to the reader, that where the data quality are good, separate curve  
162 fitting and hierarchical Bayesian curve fitting will generally match up; one of the value propositions of  
163 hierarchical Bayesian curve fitting lies in *principled model-based imputation* where the data quality might  
164 *not* permit such a thing.

### 165 4.2. Limitations of our model and inferential procedure

166 We used approximate Bayesian estimation through ADVI [11] because of the large number of  
167 data points present. Though we ran it for a long number of steps (Materials and Methods), and could  
168 visually inspect for convergence loss, we could still be under-fitting. One other consequence of using



169 ADVI is that the posterior distributions will have an under-estimated variance [12]. Suppose we are  
170 concerned mostly with the expected values of our posterior distributions. In that case, we expect to  
171 run into few issues. By contrast, if we are concerned with leveraging the posterior distribution for  
172 input design problems [13], such as optimizing melting temperatures, where the extremities of the  
173 posterior distributions are important, then the use of ADVI would give us less extreme extremities.

174 For this particular model, further hierarchical structure could have been imposed on protein  
175 measurements that came from both cells and lysate, or from two tissues. For simplicity's sake, we  
176 treated these measurements as independent. However, incorporating this knowledge into the structure  
177 of the model would be an obvious next step to improve it for this dataset. By extension, similar  
178 knowledge may be incorporated into other estimation models for different experiments. However,  
179 we do not anticipate that this point interferes with the main point of our article, which describes a  
180 decision-making protocol in high throughput experimentation that leverages hierarchical modelling's  
181 advantages.

#### 182 *4.3. The promise of hierarchical Bayesian models in high throughput biological measurements*

183 High throughput biological measurements are known to be extremely noisy. Small sample  
184 volumes, large numbers of samples, and measurement of non-control samples with single replicates,  
185 all contribute to the noise. The corollary is that these we may expect extreme-valued measurements to  
186 show up by pure random chance and systematic error. Even though in some settings we may wish to  
187 find extreme values, we desire not to be fooled by random and systematic error. With shrinkage and  
188 posterior analysis, hierarchical Bayesian modelling provides us with a principled way out.

189 In our case study, we have provided an example where in curve-fitting scenarios, such as dose  
190 response curves, regularization provided by hierarchical Bayesian models can act as a model-based  
191 safeguard against random extreme and noisy measurements, allowing us to provide a curve parameter  
192 estimate *despite* noisy measurements, while providing posterior uncertainties as a quality control  
193 measure. These posterior uncertainties can also help inform downstream experiments, such as deciding  
194 whether to re-measure a sample, re-measure groups of samples, or deciding which samples to take  
195 forward other measurements. We believe that developing hierarchical models in high throughput  
196 biological measurements may better leverage all available data and guide better iterative experimental  
197 design.

## 198 **5. Materials and Methods**

### 199 *5.1. Hierarchical Bayesian Estimation Model*

200 Here, we describe the model structure. A graphical representation of the model is available in Fig.

201 5



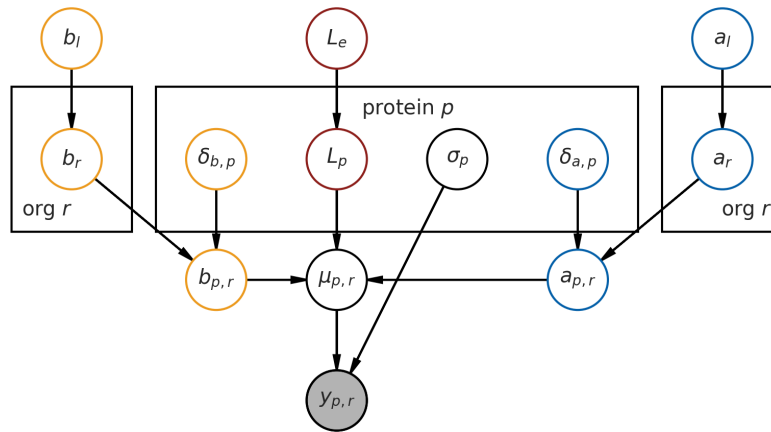

**Figure 5.** Graphical representation of the hierarchical model.

202 Our observed data, the fold change  $y$  across all proteins, are assumed to be Gaussian-distributed,  
 203 with the central tendency  $\mu$  for each observation given by the melting curve function  $f$  (which is a  
 204 function of both temperature and the  $L$ ,  $a$  and  $b$  parameters), and errors assumed to be homoskedastic.

$$y \sim \text{Normal}(f(L_{p,r}, a_{p,r}, b_{p,r}, T), \sigma_p)$$

205 Now, we describe the prior distribution assumptions that lead to each of the parameters.

206  $L$ , the lower-bound, is given by a hierarchical prior, and is indexed on a per-protein basis,  $L_p$ ,  
 207 where  $p \in \{0, 1, 2, \dots\}$  indexes each protein. It is modeled by an Exponential distribution, with the  
 208 population rate prior  $L_e$  also given by a relatively flat Exponential distribution. (Subscript  $e$  indicates  
 209 *experiment*.) This parameter helps us capture a *global* measurement lower-bound for each experiment,  
 210 as we know from the experiment description [8] that the experimental conditions primarily influence  
 211 the lower-bound.

$$L_e \sim \text{Exponential}\left(\frac{1}{30}\right)$$

$$L_p \sim \text{Exponential}(L_e)$$

212 Together,  $a$  and  $b$  give us the melting point  $T_m = \frac{a}{b}$ , and are indexed on a per-protein basis.  
 213 However, to model the organism-wide melting temperature, we introduce a per-organism  $a_r$  and  $b_r$ ,  
 214 which are random variables modeled by a positive-only Normal distribution. (The subscript  $r$  is used  
 215 instead of  $o$  for visual clarity, and  $r$  is the second letter of "organisms".)

216 Given the curve equation,  $a$  and  $b$  have to be positive for the curve to take on a denaturation  
 217 shape (i.e. decreasing  $y$  as temperature increases.) We then model a shift in  $a$  and  $b$  that is indexed by  
 218 protein  $\delta_{a,p}$  and  $\delta_{b,p}$ , which shifts the value of  $a$  and  $b$  from the organism level to give us a per-protein  
 219  $a_{p,r}$  and  $b_{p,r}$ .

220 Additionally,  $a_r$  and  $b_r$  are given population priors ( $a_l$  and  $b_l$ ). (We use subscript  $l$  to denote  
 221 that these are global priors across the tree of life.) Taken together, this model structure expresses that  
 222 proteins from one organism most likely shares an underlying melting temperature distribution with  
 223 other proteins from the same organism.

224 In mathematical notation, starting with the random variable  $a$ :

$$a_l \sim \text{Normal}(500, 1)$$

$$a_r \sim \text{BoundNormal}(a_l, 10)$$

$$\delta_{a,p} \sim \text{Normal}(0, 3)$$

$$a_p = a_r + \delta_{a,p}$$

225 And now for the random variable  $b$ :

$$b_l \sim \text{Normal}(10, 1)$$

$$b_r \sim \text{BoundNormal}(b_l, 1)$$

$$\delta_{b,p} \sim \text{Normal}(0, 1)$$

$$b_p = b_r + \delta_{b,p}$$

226 Their noise is assumed to be homoskedastic on a per-protein basis, i.e.  $\sigma_p$ , and is modeled with a  
227 standard HalfCauchy prior (with  $\beta = 1$ ).

$$\sigma_p \sim \text{HalfCauchy}(1)$$

228 We caution that this model is bespoke for the meltome dataset; other datasets with different  
229 structural assumptions will require a different model.

230 The model was implemented in PyMC3 [14]. Because of the size of the data set, we used ADVI for  
231 200,000 steps with default settings instead of the default NUTS sampling, yielding an approximation  
232 to the posterior distribution from which we drew 2000 samples.

### 233 5.2. High Throughput Measurement Data

234 High throughput measurement data were sourced from the Meltome Atlas' public-facing web  
235 server (at <http://meltomeatlas.proteomics.wzw.tum.de:5003/>) on 15 April 2020.

### 236 5.3. Separate curve fitting

237 Separate curve fitting was performed using the "curve fit" function in the "optimize" submodule  
238 of the SciPy library [15].

239 **Funding:** This research received no external funding.

240 **Acknowledgments:** We would like to acknowledge the developers of PyMC3 for providing a high quality  
241 probabilistic programming language in Python.

242 **Conflicts of Interest:** The authors are employed by the Novartis Institutes for Biomedical Research, and declare  
243 no conflicts of interest.

### 244 Abbreviations

245 The following abbreviations are used in this manuscript:

246

247 ADVI Automatic Differentiation Variational Inference

248 **References**

- 249 1. Zhang, J.; Chung, T.; Oldenburg, K. A Simple Statistical Parameter for Use in Evaluation and Validation of  
250 High Throughput Screening Assays. *J Biomol Screen* **1999**, *4*, 67–73.
- 251 2. Sui, Y.; Wu, Z. Alternative statistical parameter for high-throughput screening assay quality assessment. *J*  
252 *Biomol Screen* **2007**, *12*, 229–34.
- 253 3. Malo, N.; Hanley, J.; Cerquozzi, S.; Pelletier, J.; Nadon, R. Statistical practice in high-throughput screening  
254 data analysis. *Nat Biotechnol* **2006**, *24*, 167–75.
- 255 4. Wilson, A.; Reif, D.M.; Reich, B.J. Hierarchical dose–response modeling for high-throughput toxicity  
256 screening of environmental chemicals. *Biometrics* **2014**, *70*, 237–246.
- 257 5. Shterev, I.D.; Dunson, D.B.; Chan, C.; Sempowski, G.D. Bayesian multi-plate high-throughput screening of  
258 compounds. *Scientific reports* **2018**, *8*, 1–10.
- 259 6. Jensen, S.T.; Shirley, K.E.; Wyner, A.J. Bayesball: A Bayesian hierarchical model for evaluating fielding in  
260 major league baseball. *The Annals of Applied Statistics* **2009**, *3*, 491–520. doi:10.1214/08-aos228.
- 261 7. Kruschke, J. Bayesian estimation supersedes the t test. *J Exp Psychol Gen* **2013**, *142*, 573–603.
- 262 8. Jarzab, A.; Kurzawa, N.; Hopf, T.; Moerch, M.; Zecha, J.; Leijten, N.; Bian, Y.; Musiol, E.; Maschberger, M.;  
263 Stoehr, G.; Becher, I.; Daly, C.; Samaras, P.; Mergner, J.; Spanier, B.; Angelov, A.; Werner, T.; Bantscheff,  
264 M.; Wilhelm, M.; Klingenspor, M.; Lemeer, S.; Liebl, W.; Hahne, H.; Savitski, M.; Kuster, B. Meltome  
265 atlas-thermal proteome stability across the tree of life. *Nat Methods* **2020**, *17*, 495–503.
- 266 9. Savitski, M.M.; Reinhard, F.B.; Franken, H.; Werner, T.; Savitski, M.F.; Eberhard, D.; Molina, D.M.; Jafari, R.;  
267 Dovega, R.B.; Klaeger, S.; others. Tracking cancer drugs in living cells by thermal profiling of the proteome.  
268 *Science* **2014**, *346*.
- 269 10. Schafer, J.L. Multiple imputation: a primer. *Statistical methods in medical research* **1999**, *8*, 3–15.
- 270 11. Kucukelbir, A.; Tran, D.; Ranganath, R.; Gelman, A.; Blei, D.M. Automatic Differentiation Variational  
271 Inference. *Journal of Machine Learning Research* **2017**, *18*, 1–45.
- 272 12. Blei, D.M.; Kucukelbir, A.; McAuliffe, J.D. Variational Inference: A Review for Statisticians. *Journal of the*  
273 *American Statistical Association* **2017**, *112*, 859–877. doi:10.1080/01621459.2017.1285773.
- 274 13. Brookes, D.; Park, H.; Listgarten, J. Conditioning by adaptive sampling for robust design; PMLR: Long  
275 Beach, California, USA, 2019; Vol. 97, *Proceedings of Machine Learning Research*, pp. 773–782.
- 276 14. Salvatier, J.; Wiecki, T.V.; Fonnesbeck, C. Probabilistic programming in Python using PyMC3. *PeerJ*  
277 *Computer Science* **2016**, *2*, e55. doi:10.7717/peerj-cs.55.
- 278 15. Virtanen, P.; Gommers, R.; Oliphant, T.E.; Haberland, M.; Reddy, T.; Cournapeau, D.; Burovski, E.; Peterson,  
279 P.; Weckesser, W.; Bright, J.; others. SciPy 1.0: fundamental algorithms for scientific computing in Python.  
280 *Nature methods* **2020**, *17*, 261–272.

281 © 2021 by the authors. Submitted to *Entropy* for possible open access publication under the terms and conditions  
282 of the Creative Commons Attribution (CC BY) license (<http://creativecommons.org/licenses/by/4.0/>).
